# Supplementary material for: Characterizing pre-transplant and post-transplant kidney rejection risk by B cell immune repertoire sequencing
Source: PubMed Central journal article supplement (PMC6479061; doi:10.1038/s41467-019-09930-3), 2019-04-23
Supplement: 41467_2019_9930_MOESM4_ESM.pdf [file 41467_2019_9930_MOESM4_ESM.pdf]

## **Description of Additional Supplementary Files**

### Supplementary Data 1

The primers used with MiSeq (M154 and M155) and 454 Titanium (T7).
